# Supplementary material for: Development of a non-invasive exhaled breath test for the diagnosis of head and neck cancer
Source: PubMed Central journal article supplement (PMC7722848; doi:10.1038/s41416-020-01051-9), 2020-09-09
Supplement: 41416_2020_1051_MOESM1_ESM.pdf [file 41416_2020_1051_MOESM1_ESM.pdf]

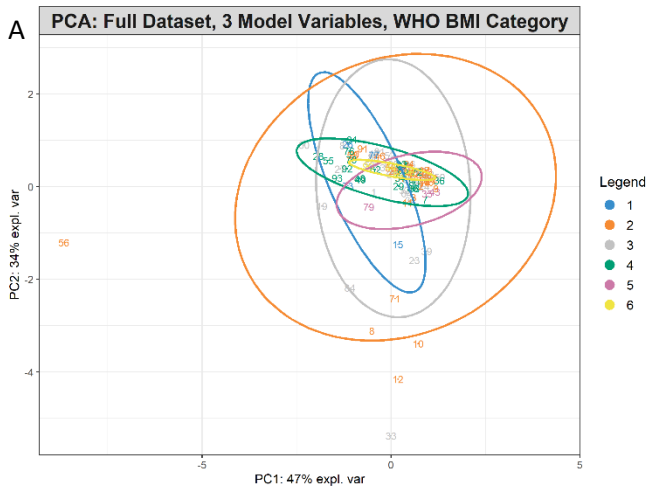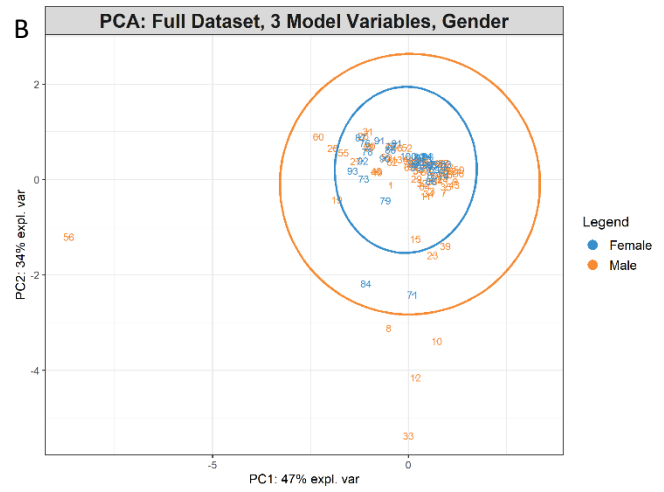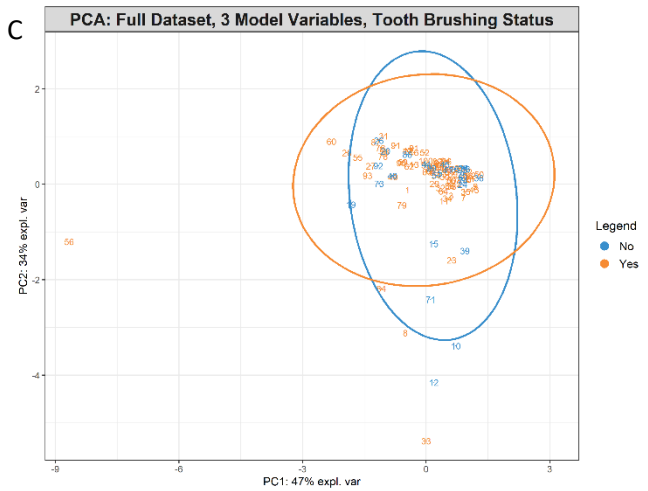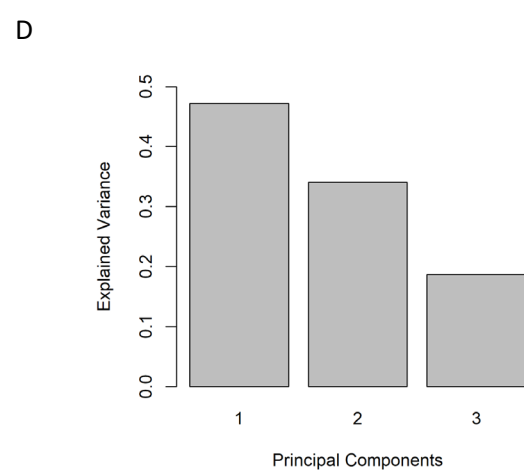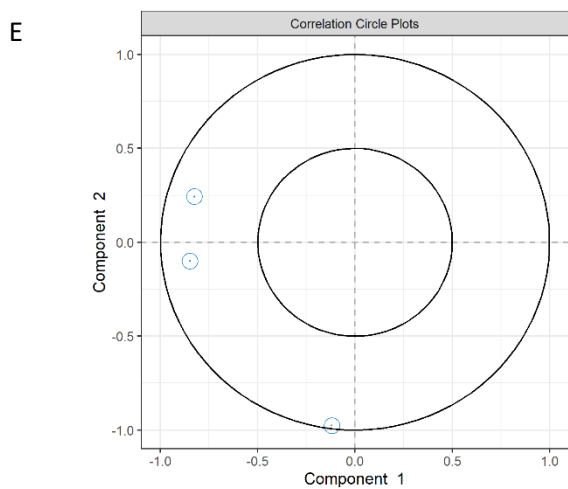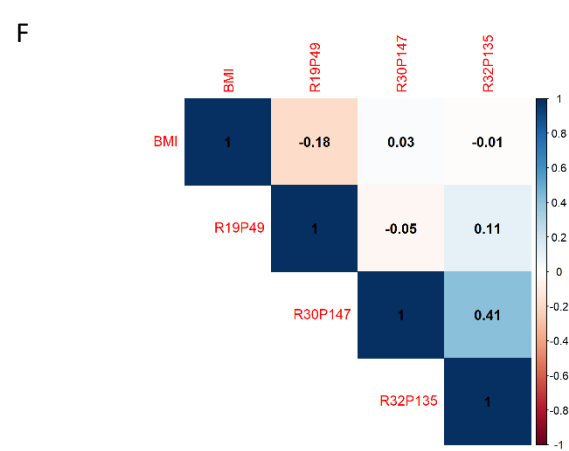

Supplementary Figure 1. Unsupervised sample classification and spearman correlation of the complete modelling dataset based on variables selected for the final logistic regression model. A, PCA classification labelled based on WHO BMI category. B, PCA classification labelled based on gender. C, PCA classification labelled based on tooth brushing status. D, PCA total variance explained by the first three components. E, Spearman correlation of variables contained in the first two principal components. F, Spearman correlation between BMI and the three variables used for the final logistic regression model. PCA, principal components analysis. BMI, body mass index. WHO, World Health Organisation.

**Supplementary Table 1. Comparison of significantly different patient factors between training and testing patient cohorts**

| Variable           | Training |        | P Value              | Testing |        | P Value              |
|--------------------|----------|--------|----------------------|---------|--------|----------------------|
|                    | Control  | Cancer |                      | Control | Cancer |                      |
| <b>n</b>           | 36       | 40     |                      | 14      | 10     |                      |
| <b>Sex</b>         |          |        | 0.005 <sup>a</sup> * |         |        | 0.008 <sup>a</sup> * |
| <b>Female</b>      | 16       | 6      |                      | 9       | 1      |                      |
| <b>Male</b>        | 20       | 34     |                      | 5       | 9      |                      |
| <b>BMI</b>         | 30.22    | 26.51  | 0.005 <sup>b</sup> * | 27.5    | 23.44  | 0.026 <sup>b</sup> * |
| <b>Brush Teeth</b> |          |        | 0.130 <sup>a</sup>   |         |        | 0.022 <sup>a</sup> * |
| <b>Yes</b>         | 29       | 26     |                      | 1       | 5      |                      |
| <b>No</b>          | 7        | 14     |                      | 12      | 5      |                      |

a, Chi-square test. b, Mann-Whitney-U test. \*, statistical significance ( $p < 0.05$ ).

**Supplementary Table 2. Variables selected and ranked based on ROC-AUC per reagent**

| Rank     | Variable Name                        |                        |                                    |
|----------|--------------------------------------|------------------------|------------------------------------|
|          | R19 (H <sub>3</sub> O <sup>+</sup> ) | R30 (NO <sup>+</sup> ) | R32 (O <sub>2</sub> <sup>+</sup> ) |
| <b>1</b> | <b>R19P49</b>                        | <b>R30P147</b>         | <b>R32P135</b>                     |
| 2        | R19P125                              | R30P143                | R32P109                            |
| 3        | R19P30                               | R30P187                | R32P82                             |
| 4        | R19P189                              | R30P211                | R32P138                            |
| 5        | R19P59                               | R30P240                | R32P31                             |
| 6        | R19P18                               | R30P64                 | R32P47                             |
| 7        | R19P81                               | R30P188                | R32P184                            |
| 8        | R19P48                               | R30P80                 | R32P40                             |
| 9        | R19P133                              | R30P95                 | R32P103                            |
| 10       | R19P77                               | R30P159                | R32P95                             |

**Supplementary Table 3. Variables selected based on overall ROC-AUC**

| Rank     | Variable Name  |
|----------|----------------|
| <b>1</b> | <b>R30P147</b> |
| <b>2</b> | <b>R19P49</b>  |
| 3        | R30P143        |
| 4        | R30P187        |
| 5        | R19P125        |
| 6        | R30P211        |
| 7        | R30P240        |
| 8        | R32P135        |
| 9        | R19P30         |
| 10       | R32P109        |
| 11       | R30P64         |
| 12       | R30P188        |
| 13       | R30P80         |
| 14       | R32P82         |
| 15       | R30P95         |
| 16       | R30P159        |
| 17       | R32P138        |
| 18       | R32P31         |

**Supplementary Table 4. Prediction based on gender and BMI**

| Variables      | Train n=76 |      |       |             | Test n=24 |      |       |             |
|----------------|------------|------|-------|-------------|-----------|------|-------|-------------|
|                | Sen        | Spe  | AUC   | 95% CI      | Sen       | Spe  | AUC   | 95% CI      |
| <b>G</b>       | 85         | 44.4 | 0.647 | 0.521-0.773 | 90        | 64.3 | 0.771 | 0.577-0.966 |
| <b>BMI</b>     | 41         | 80.6 | 0.654 | 0.530-0.777 | 60        | 64.3 | 0.693 | 0.482-0.904 |
| <b>G + BMI</b> | 87.2       | 47.2 | 0.725 | 0.610-0.841 | 90        | 57.1 | 0.764 | 0.575-0.954 |

G, gender. BMI, body mass index.

**Supplementary Table 5. Variables selected based on AUC ranking per reagent ion**

| Variable s | Train n=76    |               |              |              |              | Test n=24     |               |              |              |              |
|------------|---------------|---------------|--------------|--------------|--------------|---------------|---------------|--------------|--------------|--------------|
|            | Sensitivity   | Specificity   | AUC          | Lower 95% CI | Upper 95% CI | Sensitivity   | Specificity   | AUC          | Lower 95% CI | Upper 95% CI |
| <b>30</b>  | 100.00%       | 100.00%       | 1            | 1            | 1            | 40.00%        | 64.30%        | 0.529        | 0.284        | 0.773        |
| <b>27</b>  | 100.00%       | 100.00%       | 1            | 1            | 1            | 60.00%        | 64.30%        | 0.579        | 0.332        | 0.826        |
| <b>24</b>  | 95.00%        | 88.90%        | 0.978        | 0.953        | 1            | 70.00%        | 71.40%        | 0.621        | 0.387        | 0.856        |
| <b>21</b>  | 82.50%        | 80.60%        | 0.929        | 0.876        | 0.983        | 70.00%        | 50.00%        | 0.493        | 0.243        | 0.743        |
| <b>18</b>  | 80.00%        | 69.40%        | 0.874        | 0.799        | 0.949        | 80.00%        | 57.10%        | 0.814        | 0.625        | 1            |
| <b>15</b>  | 75.00%        | 72.20%        | 0.862        | 0.783        | 0.94         | 90.00%        | 85.70%        | 0.9          | 0.748        | 1            |
| <b>12</b>  | 67.50%        | 69.40%        | 0.815        | 0.722        | 0.908        | 70.00%        | 78.60%        | 0.779        | 0.587        | 0.97         |
| <b>9</b>   | 75.00%        | 77.80%        | 0.806        | 0.705        | 0.908        | 80.00%        | 71.40%        | 0.786        | 0.585        | 0.987        |
| <b>6</b>   | 75.00%        | 69.40%        | 0.774        | 0.668        | 0.881        | 40.00%        | 64.30%        | 0.586        | 0.342        | 0.83         |
| <b>3</b>   | <b>75.00%</b> | <b>66.70%</b> | <b>0.754</b> | <b>0.645</b> | <b>0.863</b> | <b>80.00%</b> | <b>85.70%</b> | <b>0.821</b> | <b>0.625</b> | <b>1</b>     |

**Supplementary Table 6. Variables selected based on overall AUC ranking**

| Variables | Train n=76    |               |              |              |              | Test n=24     |               |              |              |              |
|-----------|---------------|---------------|--------------|--------------|--------------|---------------|---------------|--------------|--------------|--------------|
|           | Sensitivity   | Specificity   | AUC          | Lower 95% CI | Upper 95% CI | Sensitivity   | Specificity   | AUC          | Lower 95% CI | Upper 95% CI |
| <b>10</b> | 72.50%        | 75.00%        | 0.817        | 0.723        | 0.912        | 80.00%        | 71.40%        | 0.707        | 0.482        | 0.932        |
| <b>9</b>  | 75.00%        | 72.20%        | 0.808        | 0.711        | 0.904        | 80.00%        | 71.40%        | 0.729        | 0.507        | 0.95         |
| <b>8</b>  | 70.00%        | 63.90%        | 0.795        | 0.697        | 0.893        | 70.00%        | 64.30%        | 0.671        | 0.441        | 0.902        |
| <b>7</b>  | 72.50%        | 63.90%        | 0.797        | 0.699        | 0.894        | 60.00%        | 64.30%        | 0.657        | 0.42         | 0.894        |
| <b>6</b>  | 77.50%        | 63.90%        | 0.79         | 0.687        | 0.892        | 50.00%        | 71.40%        | 0.629        | 0.384        | 0.874        |
| <b>5</b>  | 72.50%        | 69.40%        | 0.785        | 0.683        | 0.888        | 50.00%        | 71.40%        | 0.664        | 0.422        | 0.907        |
| <b>4</b>  | 70.00%        | 66.70%        | 0.752        | 0.643        | 0.861        | 80.00%        | 64.30%        | 0.857        | 0.688        | 1            |
| <b>3</b>  | 72.50%        | 66.70%        | 0.737        | 0.624        | 0.851        | 70.00%        | 78.60%        | 0.779        | 0.571        | 0.986        |
| <b>2</b>  | <b>72.50%</b> | <b>66.70%</b> | <b>0.747</b> | <b>0.633</b> | <b>0.86</b>  | <b>80.00%</b> | <b>85.70%</b> | <b>0.814</b> | <b>0.611</b> | <b>1</b>     |
| <b>1</b>  | 80.00%        | 36.10%        | 0.702        | 0.583        | 0.822        | 80.00%        | 71.40%        | 0.725        | 0.485        | 0.965        |

**Supplementary Table 7. Linear regression between included model variables and BMI on testing cohort**

| Variables                       | Adjusted R <sup>2</sup> | F statistic | P value |
|---------------------------------|-------------------------|-------------|---------|
| <b>R32P135 + R30P147+R19P49</b> | 0.041                   | 0.696       | 0.565   |
| <b>R32P135 + R19P49</b>         | 0.014                   | 0.838       | 0.446   |
| <b>R30P147 + R19P49</b>         | 0.016                   | 0.82        | 0.454   |

|                          |       |       |       |
|--------------------------|-------|-------|-------|
| <b>R30P147 + R32P135</b> | 0.03  | 0.67  | 0.523 |
| <b>R19P49</b>            | 0.016 | 0.643 | 0.431 |
| <b>R30P147</b>           | 0.01  | 1.242 | 0.277 |
| <b>R32P135</b>           | 0.024 | 0.455 | 0.507 |

**Supplementary Table 8. Predict gender (male) using final model variables (R30P147 and R19P49)**

| <b>Variables</b>        | <b>Train n=76</b> |     |       |             | <b>Test n=24</b> |     |     |             |
|-------------------------|-------------------|-----|-------|-------------|------------------|-----|-----|-------------|
|                         | Sen               | Spe | AUC   | 95% CI      | Sen              | Spe | AUC | 95% CI      |
| <b>R30P147</b>          | 100%              | 0%  | 0.582 | 0.449-0.715 | 100%             | 0%  | 0.5 | 0.261-0.739 |
| <b>R19P49</b>           | 100%              | 0%  | 0.581 | 0.439-0.724 | 100%             | 0%  | 0.5 | 0.261-0.739 |
| <b>R19P49 + R30P147</b> | 100%              | 0%  | 0.591 | 0.458-0.723 | 100%             | 0%  | 0.5 | 0.261-0.739 |
